# Supplementary material for: Energy from trash: a flexible, facile, and robust triboelectric nanogenerator based on waste polystyrene and application as a human–machine interface
Source: Royal Society of Chemistry journal article supplement (doi:10.1039/d5ra09473a), 2026-01-01
Supplement: d5ra09473a1.pdf [file d5ra09473a1.pdf]

## Supplementary Information

### Energy from trash: A flexible, facile, and robust triboelectric nanogenerator based on waste polystyrene and application as a human-machine interface

**Authors:** Raj Ankit<sup>1</sup>, Pranav Prakash<sup>2</sup>, Robin Singla<sup>2</sup>, and Jayant Kolte<sup>1,\*</sup>

**Affiliation:**

<sup>1</sup>Department of Physics and Materials Science, Thapar Institute of Engineering and Technology, Patiala, Punjab, India

<sup>2</sup>Department of Electronics and Communication Engineering, Thapar Institute of Engineering and Technology, Patiala, Punjab, India

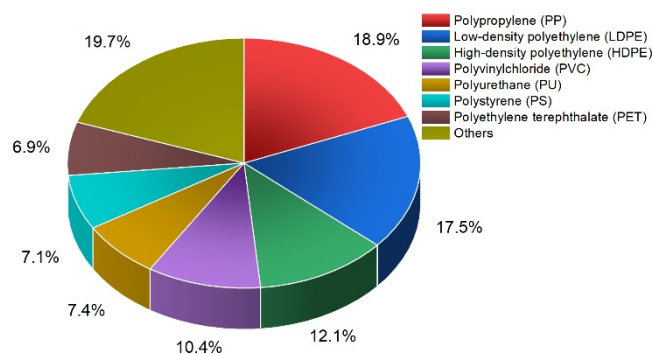

**Figure S1** Global demand for the most popular plastic products [1].

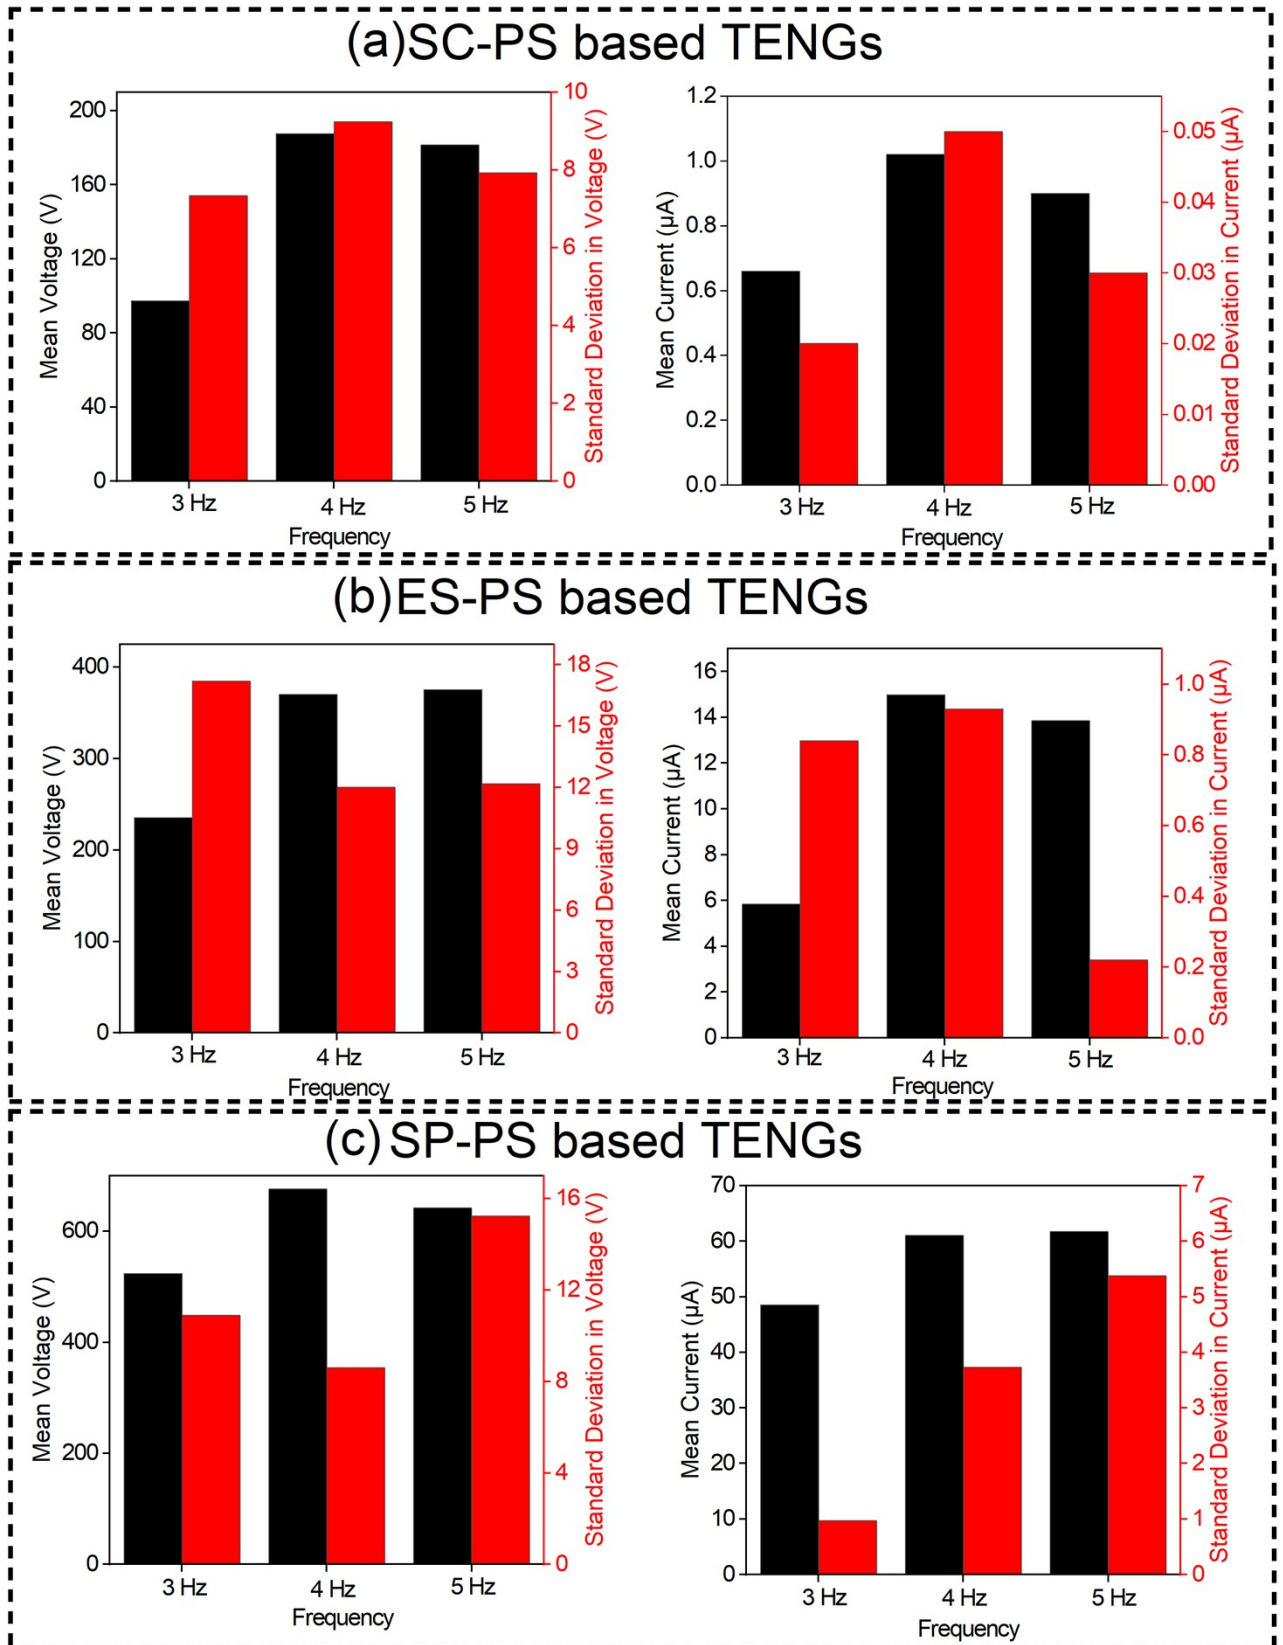

**Figure S2** The mean and SD of triboelectric outputs of (a) SC-PS-based TENGs, (b) ES-PS-based TENGs, and (c) SP-PS-based TENGs.

**File name:** supporting video V1

**Description:** The real-time video demonstration of the wireless remote-controlled car.

### **Reference**

1. Yu, J., et al., Thermal degradation of PVC: A review. Waste management, 2016. **48**: p. 300-314.
